# Scrib:Rac1 interactions are required for the morphogenesis of the ventricular myocardium

Veronika Boczonadi<sup>1</sup>, Rachel Gillespie<sup>1</sup>, Iain Keenan<sup>1</sup>, Simon A. Ramsbottom<sup>1</sup>, Charlotte Donald-Wilson<sup>1</sup>, Mariana Al Nazer<sup>1</sup>, Patrick Humbert<sup>2,3,4,5</sup>, Robert J. Schwarz<sup>6</sup>, Bill Chaudhry<sup>1</sup>, and Deborah J. Henderson<sup>1\*</sup>

<sup>1</sup>Institute of Genetic Medicine, Newcastle University, Newcastle upon Tyne NE1 3BZ, UK; <sup>2</sup>Cell Cycle and Cancer Genetics Laboratory, Peter MacCallum Cancer Centre, East Melbourne, Australia; <sup>3</sup>Sir Peter MacCallum Department of Oncology, University of Melbourne, Parkville, Melbourne, Australia; <sup>4</sup>Department of Biochemistry and Molecular Biology, University of Melbourne, Parkville, Melbourne, Australia; <sup>5</sup>Department of Pathology, University of Melbourne, Parkville, Melbourne, Australia; and <sup>6</sup>University of Houston, Houston, TX, USA

Received 1 November 2013; revised 6 August 2014; accepted 8 August 2014; online publish-ahead-of-print 18 August 2014

Time for primary review: 36 days

## Aims

The organization and maturation of ventricular cardiomyocytes from the embryonic to the adult form is crucial for normal cardiac function. We have shown that a polarity protein, Scrib, may be involved in regulating the early stages of this process. Our goal was to establish whether Scrib plays a cell autonomous role in the ventricular myocardium, and whether this involves well-known polarity pathways.

## Methods and results

Deletion of *Scrib* in cardiac precursors utilizing *Scrib*<sup>flox</sup> mice together with the *Nkx2.5-Cre* driver resulted in disruption of the cytoarchitecture of the forming trabeculae and ventricular septal defects. Although the majority of mice lacking Scrib in the myocardium survived to adulthood, they developed marked cardiac fibrosis. Scrib did not physically interact with the planar cell polarity (PCP) protein, Vangl2, in early cardiomyocytes as it does in other tissues, suggesting that the anomalies did not result from disruption of PCP signalling. However, Scrib interacted with Rac1 physically in embryonic cardiomyocytes and genetically to result in ventricular abnormalities, suggesting that this interaction is crucial for the development of the early myocardium.

## Conclusions

The Scrib–Rac1 interaction plays a crucial role in the organization of developing cardiomyocytes and formation of the ventricular myocardium. Thus, we have identified a novel signalling pathway in the early, functioning, heart muscle. These data also show that the foetus can recover from relatively severe abnormalities in prenatal ventricular development, although cardiac fibrosis can be a long-term consequence.

## Keywords

Scrib • Rac1 • Cardiomyocytes • Cardiac development • Polarity • Ventricular myocardium

## 1. Introduction

Maturation of ventricular cardiomyocytes is poorly understood.<sup>1</sup> Abnormalities in the arrangement of cardiomyocytes within the myocardium are associated with a range of adult diseases, including cardiomyopathy, hypertrophy, and heart failure.<sup>2</sup> Anything more than minor abnormalities in the formation of the ventricular myocardium during embryonic life are likely to result in death of the embryo. Nevertheless, minor defects may be compatible with survival in the postnatal period. The relationship between abnormal development of the myocardium and adult heart disease, however, remains unclear.

Scrib is a large scaffolding protein that forms complexes with other proteins at the cell junctions of expressing cells.<sup>3,4</sup> In *Drosophila*, scribble plays roles in maintaining apical–basal polarity and its loss is associated with tissue overgrowth suggesting roles in cell proliferation and/or neoplasia.<sup>4</sup> Related roles in neoplasia have been identified in mammals,<sup>5</sup> with mammalian Scrib shown to play roles in a variety of cellular processes including the establishment of apical–basal and planar cell polarity, migration, proliferation, differentiation, and vesicle trafficking.<sup>3,4</sup> Mutations in *Scrib* are found in the mouse mutant *circletail* (*Crc*).<sup>6</sup> *Crc* mutants develop a range of developmental defects that affect the neural tube, body wall, and branching organs such as the lung.<sup>6,7</sup> These

\* Corresponding author. Tel: +44 191 241 8644; fax: +44 191 241 8666, Email: deborah.henderson@ncl.ac.uk

© The Author 2014. Published by Oxford University Press on behalf of the European Society of Cardiology.

This is an Open Access article distributed under the terms of the Creative Commons Attribution Non-Commercial License (<http://creativecommons.org/licenses/by-nc/4.0/>), which permits non-commercial re-use, distribution, and reproduction in any medium, provided the original work is properly cited. For commercial re-use, please contact [journals.permissions@oup.com](mailto:journals.permissions@oup.com)

abnormalities have been ascribed to disruption of planar cell polarity (PCP) signalling, at least in part via the interaction of Scrib with the core PCP protein, Vangl2.<sup>6,8</sup>

*Crc* mutants also develop congenital heart defects that include abnormalities of the ventricular myocardium, as well as malalignment defects affecting the outflow region and the atrioventricular canal. It was previously assumed that all of these defects result directly from loss of Scrib in the myocardium.<sup>9</sup> In this study, we have deleted *Scrib* solely in the myocardium and shown that this recapitulates the ventricular septal defects and thinned myocardial wall observed in *Crc* mutants. Interestingly, the mice largely recover from these defects and survive to adulthood, although they develop cardiac fibrosis. Unlike elsewhere in the embryo, interactions between Scrib and Vangl2 do not appear to be crucial for the development of the ventricular myocardium. However, we show that Scrib interacts, both physically and genetically, with Rac1 during formation of the ventricular myocardium.

## 2. Methods

### 2.1 Mouse strains and histological analysis

*Scrib<sup>flox</sup>*,<sup>5</sup> *Rac1<sup>flox</sup>*,<sup>10</sup> and *Nkx2.5-Cre*<sup>11</sup> mice were used extensively in these studies. Other Cre drivers, including *PGK-Cre*,<sup>12</sup> *Isl1-Cre*,<sup>13</sup> *Mlc2v-Cre*,<sup>14</sup> *Wnt1-Cre*,<sup>15</sup> and *Gata5-Cre*,<sup>16</sup> were also used to conditionally delete Scrib or Rac1 in the required cell type. Timed matings were carried out overnight and the presence of a copulation plug was designated embryonic day (E) 0.5. All animals were sacrificed by cervical dislocation. All mice were maintained on a C57Bl/6 background, backcrossed for three generations, and then maintained by brother–sister matings. Mice were maintained according to the Animals (Scientific Procedures) Act 1986, UK, under project license PPL 30/3876. All experiments were approved by the Newcastle University Ethical Review Panel and conformed to Directive 2010/63/EU of the European Parliament. Littermate controls were used in all experiments.

Embryos were harvested at different developmental stages, rinsed in ice-cold phosphate-buffered saline, and either fixed overnight in 4% paraformaldehyde (PFA) before paraffin embedding, processing for cryoembedding, or western blotting and co-immunoprecipitation. For basic histological analysis, paraffin-embedded embryos or isolated hearts were sectioned and stained with H&E or alizarin red to detect fibrosis, following standard protocols. A minimum of three mutants and controls were used for each analysis. For analysis of the ventricular wall thickness, ImageJ was used to measure the cross section of the myocardium in three fixed positions (four controls and six mutants), averaged for three measurements in each region. For proliferation and cell death analyses, alternate sections through the E10.5 ventricular myocardium were stained and counted for positive cells, as a percentage of the total number of nuclei. In each case, a minimum of three animals of each genotype were analysed. For quantification of cardiac hypertrophy, adult hearts were dissected at 6 months of age, fixed in 4% PFA then sectioned and stained with H&E. Cardiomyocyte cell nuclei were counted per fixed unit area using the ImageJ analysis software. Five different areas were chosen within the myocardium of each mouse and the average numbers were compared. Due to the relatively small numbers of samples in each data set, the Kruskal–Wallis ANOVA test for non-parametric data was used for statistical analysis.

### 2.2 Cell culture

Cardiac H9C2 cells<sup>17</sup> (undifferentiated neonatal rat cardiomyoblasts) were grown in Dulbecco's modified Eagle's medium, 10% foetal bovine serum, and 5% antibiotics (streptomycin + penicillin) under standard conditions.

### 2.3 Immunofluorescence

Samples for immunohistochemistry were either fixed in PFA and paraffin-embedded or equilibrated through a sucrose series (to 15%) and

subsequently mounted and frozen in OTC (Tissue-tek). In the latter case, air-dried sections were fixed with methanol or 4% PFA for immunostaining. Primary antibodies utilized were Scribble (Santa Cruz); Vangl2 (gift from Dr Charlotte Dean, London, UK), MF20 (DSHB), phospho-histone H3 (Millipore), cleaved caspase-3 (Cell Signalling), sarcomeric  $\alpha$  actinin (Abcam), alpha-smooth muscle actin ( $\alpha$ -SMA) (Sigma), cardiac troponin I (Hytest Ltd), Rac1 (Millipore),  $\beta$ -PIX (Millipore),  $\beta$ -catenin (BD Transduction Laboratories), N-cadherin (BD Transduction Laboratories), and connexin-43 (Chemicon). Alexa fluor 488 and 596-conjugated secondary antibodies (Invitrogen) were used to detect the primary antibody. Phalloidin (Sigma) was used to stain the actin cytoskeleton and wheat germ agglutinin (Alexa fluor 647; Invitrogen) was used to stain cell membranes. Cell nuclei were identified using DAPI. Immunofluorescence images were collected with using a Zeiss Axioimager Z1 fluorescence microscope equipped with Zeiss Apotome 2 (Zeiss, Germany). Acquired images were processed with the AxioVision Rel 4.9 software.

### 2.4 Western blotting

H9C2 cells and mouse hearts were stored at  $-80^{\circ}\text{C}$  until use for western blotting.<sup>18</sup> Cells were lysed and then the extracts were cleared by centrifugation and stored at  $-80^{\circ}\text{C}$  until use. The extracts were boiled in  $2\times$  Laemmli sample buffer. Samples were then subjected to SDS–polyacrylamide gel electrophoresis followed by western blot analysis using specific antibodies raised against Scrib (Santa Cruz), Vangl2 (Santa Cruz), Rac1 (Millipore),  $\beta$ -PIX (Millipore), Git1 (Novus Biologicals), or  $\beta$ -tubulin (Abcam). Horseradish peroxidase-conjugated secondary antibodies (Jackson ImmunoResearch Laboratories) were used for detection using the enhanced chemiluminescence method (GE Healthcare BioSciences). Quantification of protein levels was determined by densitometry using the ImageJ software. Band intensities were normalized to  $\beta$ -tubulin. The Kruskal–Wallis ANOVA test for non-parametric data was used for statistical analysis.

### 2.5 Co-immunoprecipitation

Embryonic hearts (E10.5) were homogenized in ice-cold NP-40 lysis buffer, and the lysates pre-cleared with protein G beads (Pierce, Thermo Scientific) and then incubated with the primary antibody [Scrib from Santa Cruz; Rac1 (Millipore);  $\beta$ -PIX (Millipore),  $\beta$ -catenin (BD Transduction Laboratories) at  $4^{\circ}\text{C}$ , overnight]. Lysates were incubated with protein G beads to precipitate complexes for 2 h at  $4^{\circ}\text{C}$ . The immunocomplexes were recovered by centrifugation, washed, precipitated, and denatured. Proteins were size separated by SDS–polyacrylamide gel electrophoresis and western blot analysis using antibodies as above.

## 3. Results

### 3.1 *Scrib<sup>ff</sup>;PGK-Cre* recapitulate the cardiac phenotype of *Crc* mice

To understand the tissue-specific requirement for Scrib function during cardiovascular development, we utilized *Scrib<sup>flox</sup>* mice (*Scrib<sup>f</sup>*).<sup>5</sup> Crossing these mice to *PGK-Cre* mice (Figure 1A), deleting *Scrib* throughout the embryo (Figure 1B), recapitulated the *Crc/Crc* external phenotype.<sup>6</sup> Neural tube defects and gastroschisis were observed in all *Scrib<sup>ff</sup>*; *PGK-Cre* mutants (Table 1 and Figure 1C–E). Sectioning showed that the *Scrib<sup>ff</sup>*; *PGK-Cre* embryos developed heart malformations including abnormalities in the ventricular myocardium, alignment of the outflow vessels with the ventricular chambers, and abnormal positioning of the heart in the chest, recapitulating those seen in *Crc* mutants<sup>9</sup> (Figure 1F–K).

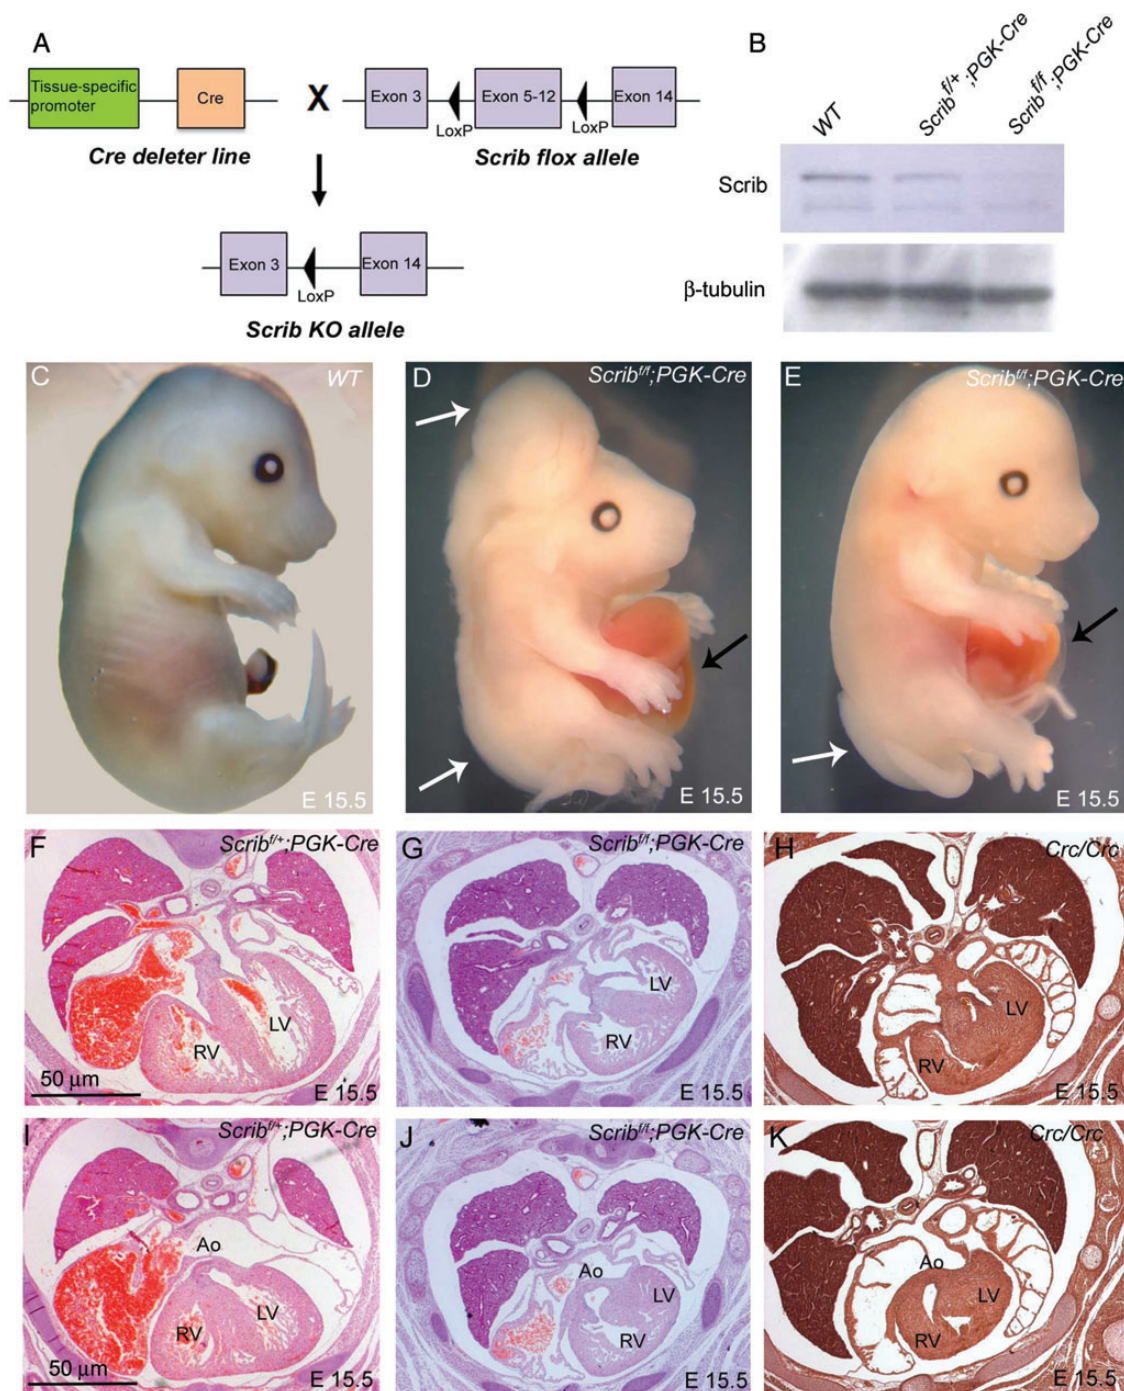

**Figure 1** Cardiac anomalies in *Scrib*<sup>fl/fl</sup>;*PGK-Cre* embryos. (A) Schematic representation of breeding strategy to obtain *Scrib*-deleted mice. (B) Western blotting ( $n = 3$ ) showed that *Scrib* protein levels were markedly reduced in *Scrib*<sup>fl/fl</sup>;*PGK-Cre* at E15.5.  $\beta$ -Tubulin was used as a loading control. (C–E) *Scrib*<sup>fl/fl</sup>;*PGK-Cre* embryos display neural tube defects (white arrows) and gastroschisis (black arrows) at E14.5. (F and I) *Scrib*<sup>fl/+</sup>;*PGK-Cre* have normal hearts. (G and J) *Scrib*<sup>fl/fl</sup>;*PGK-Cre* exhibit double outlet right ventricle, ventricular septal defects, and septal hyperplasia that closely resemble those seen in *Crc/Crc* (H and K). See Table 1 for numbers of animals analysed. Ao, aorta; LV, left ventricle; RV, right ventricle. Scale bar = 50  $\mu$ m.

### 3.2 *Scrib* is required in myocardial progenitors for normal development of the ventricular myocardium

As the global knockout of *Scrib* encompassed the *Crc* cardiac phenotype, we set out to investigate the role of different cell lineages in creating this phenotype. Tissue-specific deletion of *Scrib* using *Nkx2.5-Cre*

(myocardial progenitors) had no effect on the external phenotype of the embryos (Figure 2A,C). However, ~25% of the mutants died *in utero* by E14.5 (2 of 7; Table 1). Isolated hearts appeared less mature than control littermates at E14.5 (Figure 2B,D), suggesting that there might be an abnormality in the development of the heart muscle. Defects in the ventricular myocardium were observed as early as E11.5 in the mutant embryos, manifested as stunted trabeculation and

**Table 1** Analysis of phenotypes of *Scrib*-depleted embryos at E14.5–E15.5

| Genotype                             | Tissue specificity                         | Percentage of embryos with external phenotype | External abnormalities observed                    | Percentage of embryos with heart defect | Types of cardiac malformation        |
|--------------------------------------|--------------------------------------------|-----------------------------------------------|----------------------------------------------------|-----------------------------------------|--------------------------------------|
| <i>Scrib<sup>ff</sup>;PGK-Cre</i>    | Somatic and germ cells                     | 100                                           | Gastroschisis<br>Neural tube defects               | 100                                     | VSD, DORV<br>Malpositioning in chest |
| <i>Scrib<sup>ff</sup>;Wnt1-Cre</i>   | Neural crest cells                         | 25                                            | Exencephaly                                        | 25                                      | VSD                                  |
| <i>Scrib<sup>ff</sup>;GATA5-Cre</i>  | Epicardium and left ventricular myocardium | 20                                            | Axial rotation of the lower spine<br>Gastroschisis | 20                                      | VSD, DORV<br>Malpositioning in chest |
| <i>Scrib<sup>ff</sup>;Isl1-Cre</i>   | Second heart field                         | 0                                             | None                                               | 0                                       | None                                 |
| <i>Scrib<sup>ff</sup>;Mlc2v-Cre</i>  | Myocardium                                 | 0                                             | None                                               | 40                                      | Thin ventricular wall                |
| <i>Scrib<sup>ff</sup>;Nkx2.5-Cre</i> | Cardiac progenitors                        | 0                                             | None                                               | 100                                     | Thin ventricular wall, VSD           |

VSD, ventricular septal defect; DORV, double outlet right ventricle.

poor formation of the interventricular septum (Figure 2E–J). Closer analysis using wheat germ agglutinin staining to reveal cell boundaries showed that the cellular architecture of the trabeculae was disrupted in *Scrib<sup>ff</sup>;Nkx2.5-Cre* compared with control littermates (Figure 2G,J). Sectioning of E14.5 hearts revealed peri-membranous and muscular ventricular septal defects, often in combination with thinned ventricular wall (4 of 7; Figure 2K–O). Abnormalities in the formation of the muscular ventricular septum were also found in around half of the *Scrib<sup>ff</sup>;Mlc2v-Cre* embryos (in which *Scrib* was deleted in ventricular cardiomyocytes) examined at E14.5 (Table 1 and see Supplementary material online, Figure S1). Strikingly, there were no outflow malalignment defects or abnormalities in heart positioning in any of the *Scrib<sup>ff</sup>;Nkx2.5-Cre* or *Scrib<sup>ff</sup>;Mlc2v-Cre* embryos examined, indicating that these phenotypes did not result from direct roles of *Scrib* in the myocardium.

To investigate the cause of the abnormalities in the formation of the trabeculae within the ventricle, we carried out proliferation and cell death analyses at E10.5, before an obvious abnormality in the ventricular myocardium was apparent in the *Scrib<sup>ff</sup>;Nkx2.5-Cre* hearts. However, there were no significant differences in either parameter between mutant and control littermates (Figure 3A,B). We carried out immunohistochemistry for a range of proteins, including filamentous actin, myosin heavy chain,  $\alpha$ -SMA,  $\alpha$ -actinin, and cardiac troponin-I, which label developing cardiomyocytes. These markers showed that there was abnormal expression of some differentiated cardiomyocyte markers in the mutant hearts with a delay in the formation of Z-lines as shown by  $\alpha$ -SMA and  $\alpha$ -actinin (Figure 3G–J). Moreover, there was reduced expression of cardiac troponin I, particularly in the trabeculae (Figure 3K,L). These markers were, however, indistinguishable from controls by E14.5 (data not shown).

To investigate whether the ventricular maturation abnormalities we observed had long-term consequences, we allowed *Scrib<sup>ff</sup>;Nkx2.5-Cre* litters to be born. Four of five *Scrib<sup>ff</sup>;Nkx2.5-Cre* animals survived to 6 months of age. Heart weight to body weight ratios (mg/g) were not significantly different between *Scrib<sup>ff</sup>;Nkx2.5-Cre* and control littermates (Figure 4 and see Supplementary material online, Table S1). Cardiomyocytes appeared normal in the *Scrib<sup>ff</sup>;Nkx2.5-Cre* hearts with no evidence of cardiac hypertrophy; however, there was evidence of increased cardiac fibrosis within the interstitium of the ventricular myocardium as shown by staining for Sirius Red (Figure 4C–H). Fibrosis was also seen in *Scrib<sup>ff</sup>;Mlc2v-Cre* animals (data not shown). Thus, these data suggest that the mutant hearts largely recover from the abnormalities

in the ventricular myocardium seen earlier in gestation, although cardiac fibrosis develops as a consequence.

### 3.3 Cardiac malalignment defects are secondary to other defects

As deletion of *Scrib* solely in cardiomyocytes did not explain the cardiac malalignment defects observed in *Crc* mutants, we wanted to establish which other cell type might require *Scrib* function for normal heart development. We utilized a number of other mouse *Cre* driver lines that direct expression to specific cell types during heart development, including *Wnt1-Cre* [neural crest cells (NCC)], *Isl1-Cre* (second heart field), and *Gata5-Cre* (epicardium and left ventricular myocardium). There was no external phenotype associated with deletion of *Scrib* from these cell types, except in two individual embryos (out of a total of 18) where exencephaly and gastroschisis were seen (Table 1). In each case, the conditionally null mutants with a normal external phenotype had normal hearts. In contrast, a ventricular septal defect was observed in the single *Scrib<sup>ff</sup>;Wnt1-Cre* embryo that developed exencephaly, and a double outlet right ventricle and ventricular septal defect were found in the single *Scrib<sup>ff</sup>;Gata5-Cre* embryo that manifested gastroschisis (Table 1 and see Supplementary material online, Figure S2). As all *Scrib<sup>ff</sup>;PGK-Cre* and *Crc/Crc* embryos displayed neural tube defects and/or gastroschisis, these data suggest that the cardiac malalignment and positioning defects are secondary to the gross abnormalities in body patterning also observed in these mutants.

### 3.4 *Scrib*:Vangl2 interactions are not crucial for ventricular development

Our previous studies suggested that *Scrib* might interact with the PCP protein, Vangl2, in the heart.<sup>9</sup> To begin to uncover the roles these two proteins might play in developing cardiomyocytes, we co-localized each with junctional proteins at E8.5 and E10.5. Whereas *Scrib* did not co-localize with markers of tight junctions [Zona occludens 1 (ZO-1)], desmosomes (desmoplakin), or focal adhesions (vinculin) (data not shown), it did co-localize with both  $\beta$ -catenin and N-cadherin in E8.5 and E10.5 myocardium (Figure 5A,B and see Supplementary material online, Figure S3). Moreover, *Scrib* also co-localized with the gap junction protein, connexin-43, in developing cardiomyocytes (Figure 5C,D). In contrast, Vangl2 was mostly cytoplasmic in developing cardiomyocytes, with only minimal localization to cell membranes (Figure 5E–H and data

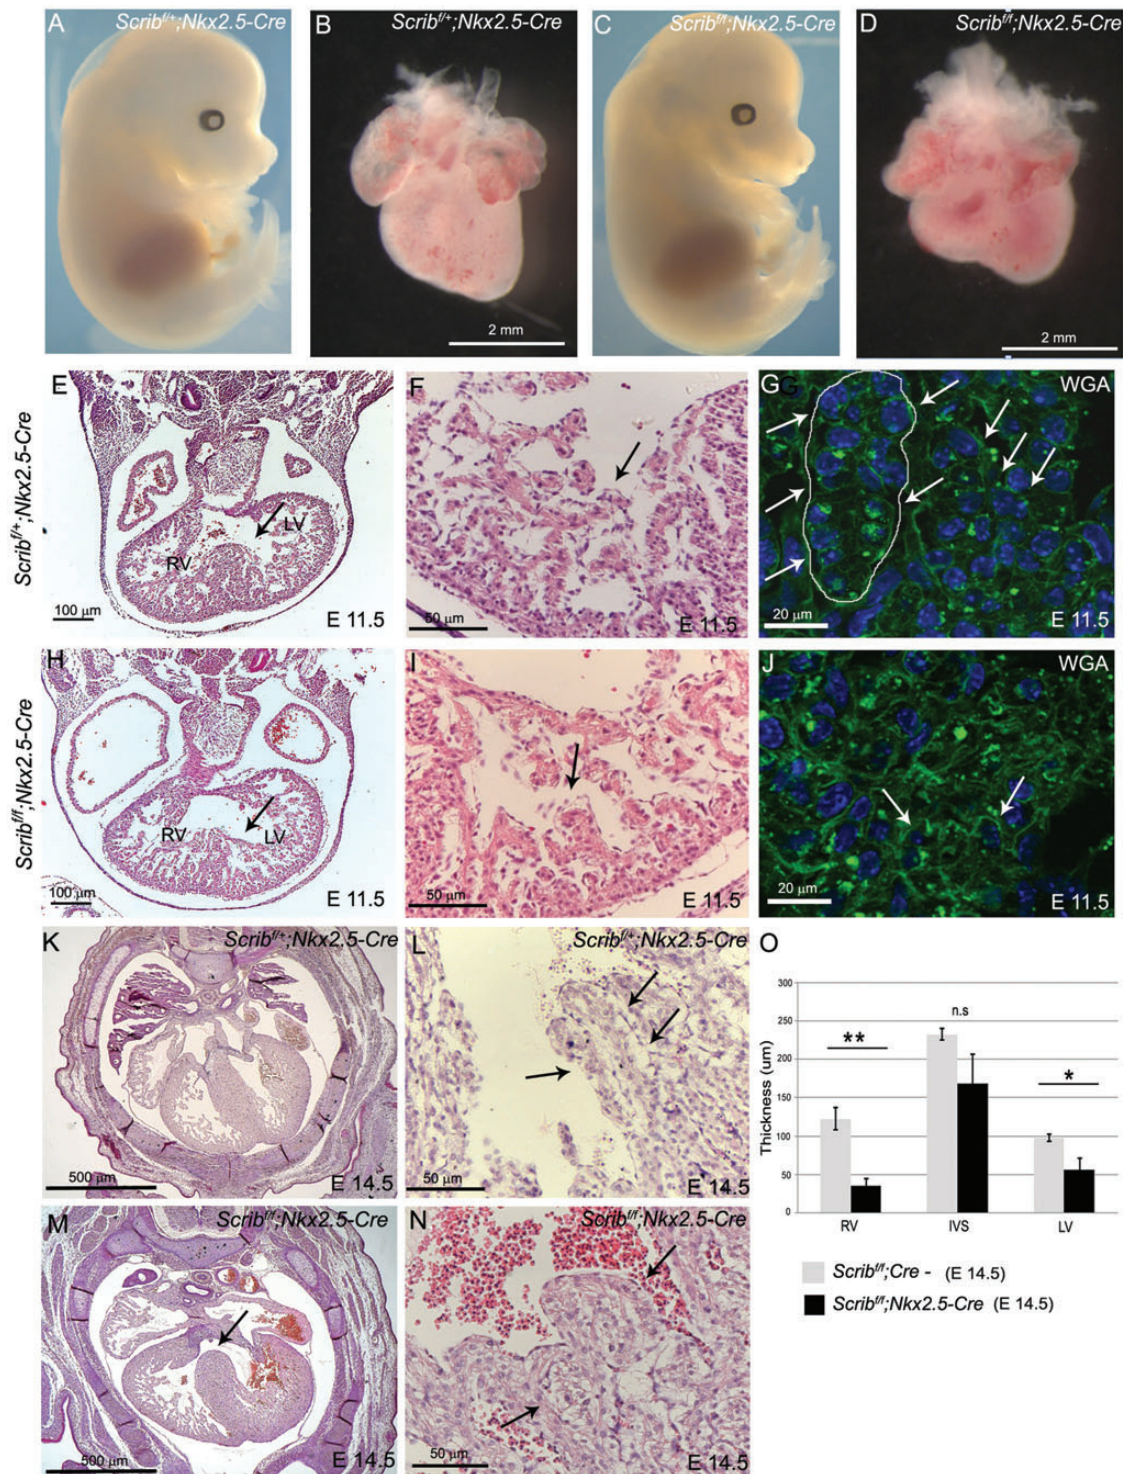

**Figure 2** Defects in the ventricular myocardium in *Scrib<sup>fl/fl</sup>;Nkx2.5-Cre*. (A–D) *Scrib<sup>fl/fl</sup>;Nkx2.5-Cre* mouse mutants have a normal external phenotype at E14.5, whereas the heart appears smaller and immature when compared with control littermates. See Table 1 for numbers of animals analysed. (E–J) Transverse sectioning of E11.5 *Scrib<sup>fl/fl</sup>;Nkx2.5-Cre* hearts ( $n = 5$ ) revealed abnormalities in the trabeculae and in the formation of the interventricular septum (arrows). High-power views of the trabeculae show that the trabecular network (arrow) is less well developed in the mutant hearts than in control littermates (compare I with F). Labelling of the cell membranes with wheat germ agglutinin reveals that the cellular architecture of the trabeculae (arrows) appears more disorganized in the mutant (J) than in the control (G) ( $n = 3$ ). (K–N) Transverse sections of *Scrib<sup>fl/fl</sup>;Nkx2.5-Cre* hearts at E14.5 reveal perimembranous septal defects (arrow). High-power views show that the trabeculae (arrows) appear thickened in the mutants (N) compared with control littermates (L). (O) Measurements ( $n = 6$ ) revealed significant differences in the thickness of the right and left ventricular walls, but not the septum. Error bars represent standard deviation, \* $P < 0.05$ . LV, left ventricle; RV, right ventricle; WGA, wheat germ agglutinin. Scale bar: B,D = 2 mm. E,H = 100  $\mu\text{m}$ , F,I,L,N = 50  $\mu\text{m}$ , G,J = 20  $\mu\text{m}$ , K,M = 500  $\mu\text{m}$ .

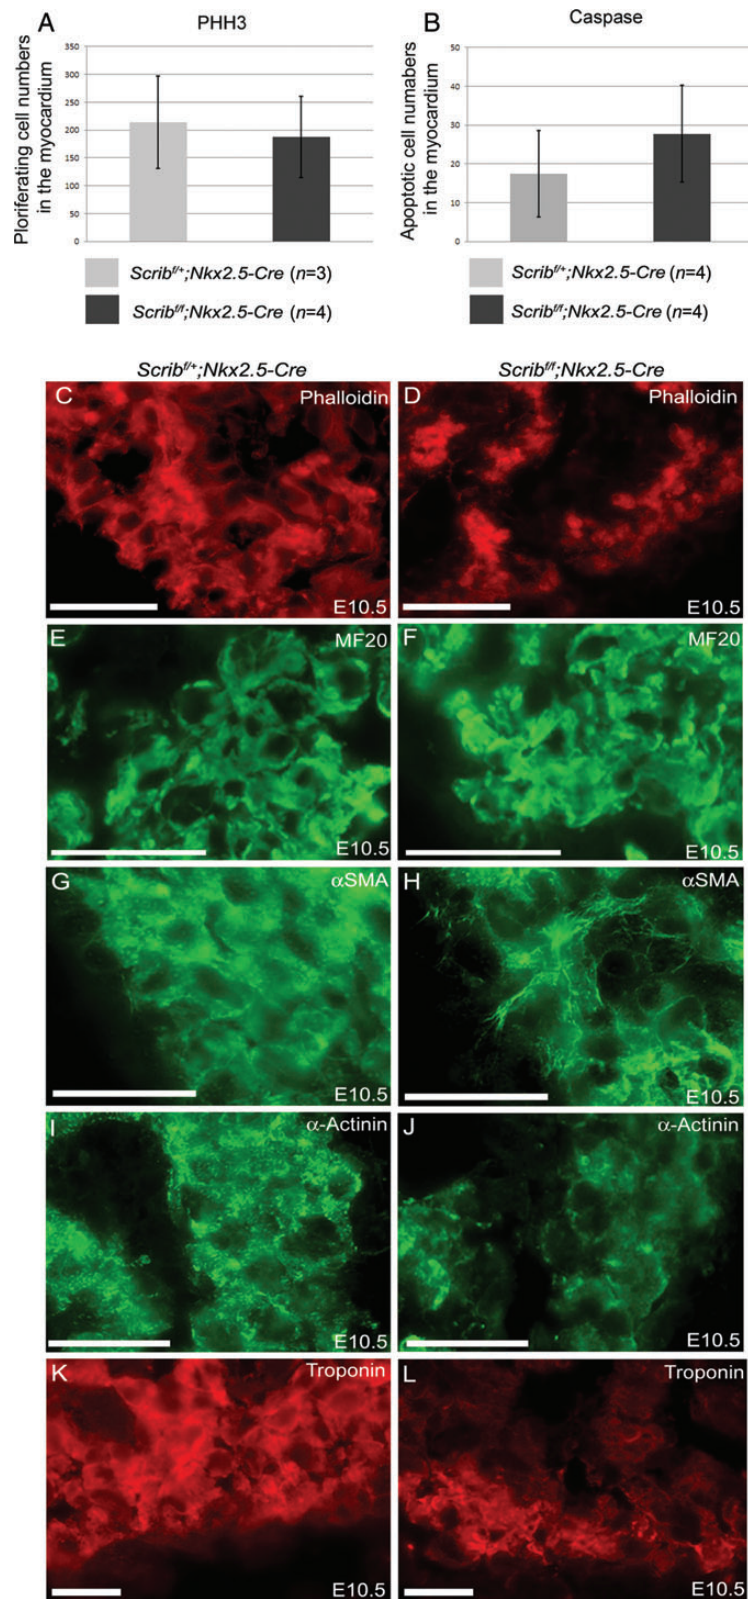

**Figure 3** Abnormal expression of cardiomyocyte markers in *Scrib<sup>fl/fl</sup>;Nkx2.5-Cre*. (A and B) Neither proliferation (pHH3) nor cell death (cleaved caspase-3) was altered in myocardium from *Scrib<sup>fl/fl</sup>;Nkx2.5-Cre* ventricles compared with control littermates at E10.5. (C–L) While phalloidin and MF20 staining did not show any reproducible differences between control and mutant cardiomyocytes in the E10.5 ventricle (C–F), analysis of other markers suggested that the *Scrib<sup>fl/fl</sup>;Nkx2.5-Cre* ventricles were immature in comparison with control littermates; whereas striations suggesting the presence of sarcomeres (labelled by α-SMA and α-actinin) were readily apparent in control cells, these were absent in the mutant cells (H and J). In addition, there was markedly reduced expression of cardiac troponin I (K and L) in *Scrib<sup>fl/fl</sup>;Nkx2.5-Cre* trabeculae. *n* = 3 for all experiments. Scale bar = 20 μm.

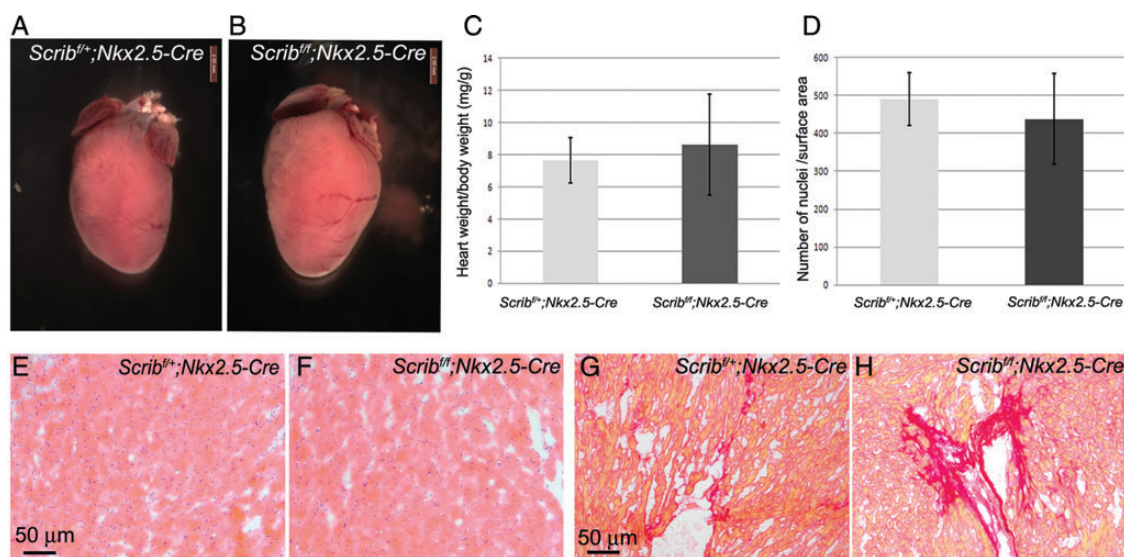

**Figure 4** Surviving *Scrib<sup>fl/fl</sup>;Nkx2.5-Cre* hearts develop cardiac fibrosis. (A–C) Six-month-old *Scrib<sup>fl/fl</sup>;Nkx2.5-Cre* hearts appeared slightly larger than control littermates, although heart weight:body weight ratios showed that this was variable and not statistically significant. Error bars in C represent standard deviation. (D–F) H&E staining of myocardium shows no obvious signs of abnormalities in *Scrib<sup>fl/fl</sup>;Nkx2.5-Cre* hearts. Quantification of cardiomyocyte nuclei/unit surface area showed no significant difference compared with control littermates (D). (G and H) Sirius Red staining revealed increased fibrosis of the ventricular myocardium of *Scrib<sup>fl/fl</sup>;Nkx2.5-Cre* mice compared with control littermates.

not shown). This contrasted with its expression in epithelial tissues such as the pharyngeal endoderm, where it was closely associated with the cell membrane (see Supplementary material online, Figure S3). Thus, while Vangl2 and Scrib were both associated with the cell membrane, although to differing extents, they did not obviously co-localize in ventricular cardiomyocytes (Figure 5I–K). In support of this, Scrib and Vangl2 failed to co-immunoprecipitate from a protein extract from H9C2 cardiomyocytes (Figure 5L). Thus, we conclude that although Vangl2 and Scrib genetically and physically interact in some tissues, there is no direct interaction in the developing myocardium, at least before the phenotype becomes apparent in the *Scrib<sup>fl/fl</sup>;Nkx2.5-Cre* embryos.

### 3.5 Scrib interacts with $\beta$ -PIX and Rac1 in the developing myocardium

We sought to identify potential Scrib-interacting proteins that might be important in the developing myocardium. Scrib interacts with  $\beta$ -PIX, a guanine exchange factor for the RhoGTPase Rac1, in epithelial and neuronal cells.<sup>19,20</sup> As RhoGTPases, including Rac1, are known to play crucial roles in processes such as cell adhesion and cell shape changes,<sup>21</sup> we reasoned that Scrib might also be interacting with these factors in the developing myocardium.

We first carried out fluorescent immunohistochemistry for Scrib,  $\beta$ -PIX, and Rac1 in E8.5 and E10.5 hearts, revealing that  $\beta$ -PIX and Rac1 co-localize with Scrib in the developing myocardium (Figure 6A–H and data not shown). We next carried out co-immunoprecipitation reactions for endogenous Scrib,  $\beta$ -PIX, and Rac1 in H9C2 cells. Both Rac1 and  $\beta$ -PIX were immunoprecipitated by Scrib from the H9C2 cell lysate (Figure 6I). In contrast,  $\beta$ -catenin was not, despite also co-localizing with Scrib at the cell membrane. The experiment was repeated using crude lysates from isolated hearts from E10.5

embryos. Again, both  $\beta$ -PIX and Rac1, but not  $\beta$ -catenin, were pulled down with the Scrib antibody (Figure 6I). These results clearly demonstrate that both  $\beta$ -PIX and Rac1 are present in a protein complex with Scrib not only in H9C2 cells, but also in embryonic cardiomyocytes.

### 3.6 Scrib is required for membrane association of $\beta$ -PIX and Rac1 in cardiomyocytes

To investigate the relevance of the Scrib:Rac1: $\beta$ -PIX interaction, we examined the expression of Rac1 and  $\beta$ -PIX in *Scrib<sup>fl/fl</sup>;Nkx2.5-Cre* mutant and control littermate hearts at E8.5 and E10.5. Both were depleted from the cardiomyocyte membrane in the Scrib-deficient myocardium (Figure 6J–M and data not shown). Western blotting was carried out using protein extracts from isolated E10.5 *Scrib<sup>fl/fl</sup>;Nkx2.5-Cre* hearts and from control littermates. These analyses showed that the levels of Rac1 and  $\beta$ -PIX were similar in the *Scrib<sup>fl/fl</sup>;Nkx2.5-Cre* mutant hearts, compared with control littermates. Moreover, the levels of GIT1, another component of the  $\beta$ -PIX/Rac1 complex, were also similar in control and mutant hearts (Figure 6N,O). Thus, these data support the idea that Scrib, as a scaffolding protein, may stabilize the Rac1/ $\beta$ -PIX complex at the membrane of cardiomyocytes, rather than regulate the level of its expression.

### 3.7 Rac1 plays essential roles in the development of the myocardium

We next wanted to test the *in vivo* importance of the Scrib/ $\beta$ -PIX/Rac1 interaction in myocardial development. Although  $\beta$ -PIX<sup>fl<sup>ox</sup></sup> mice are not available, *Rac1<sup>fl<sup>ox</sup></sup>* (*Rac1<sup>f</sup>*) mice have been described.<sup>9</sup> To test the idea that Rac1 plays crucial roles in the developing myocardium, we intercrossed *Rac1<sup>f</sup>* mice with *Nkx2.5-Cre* mice. At

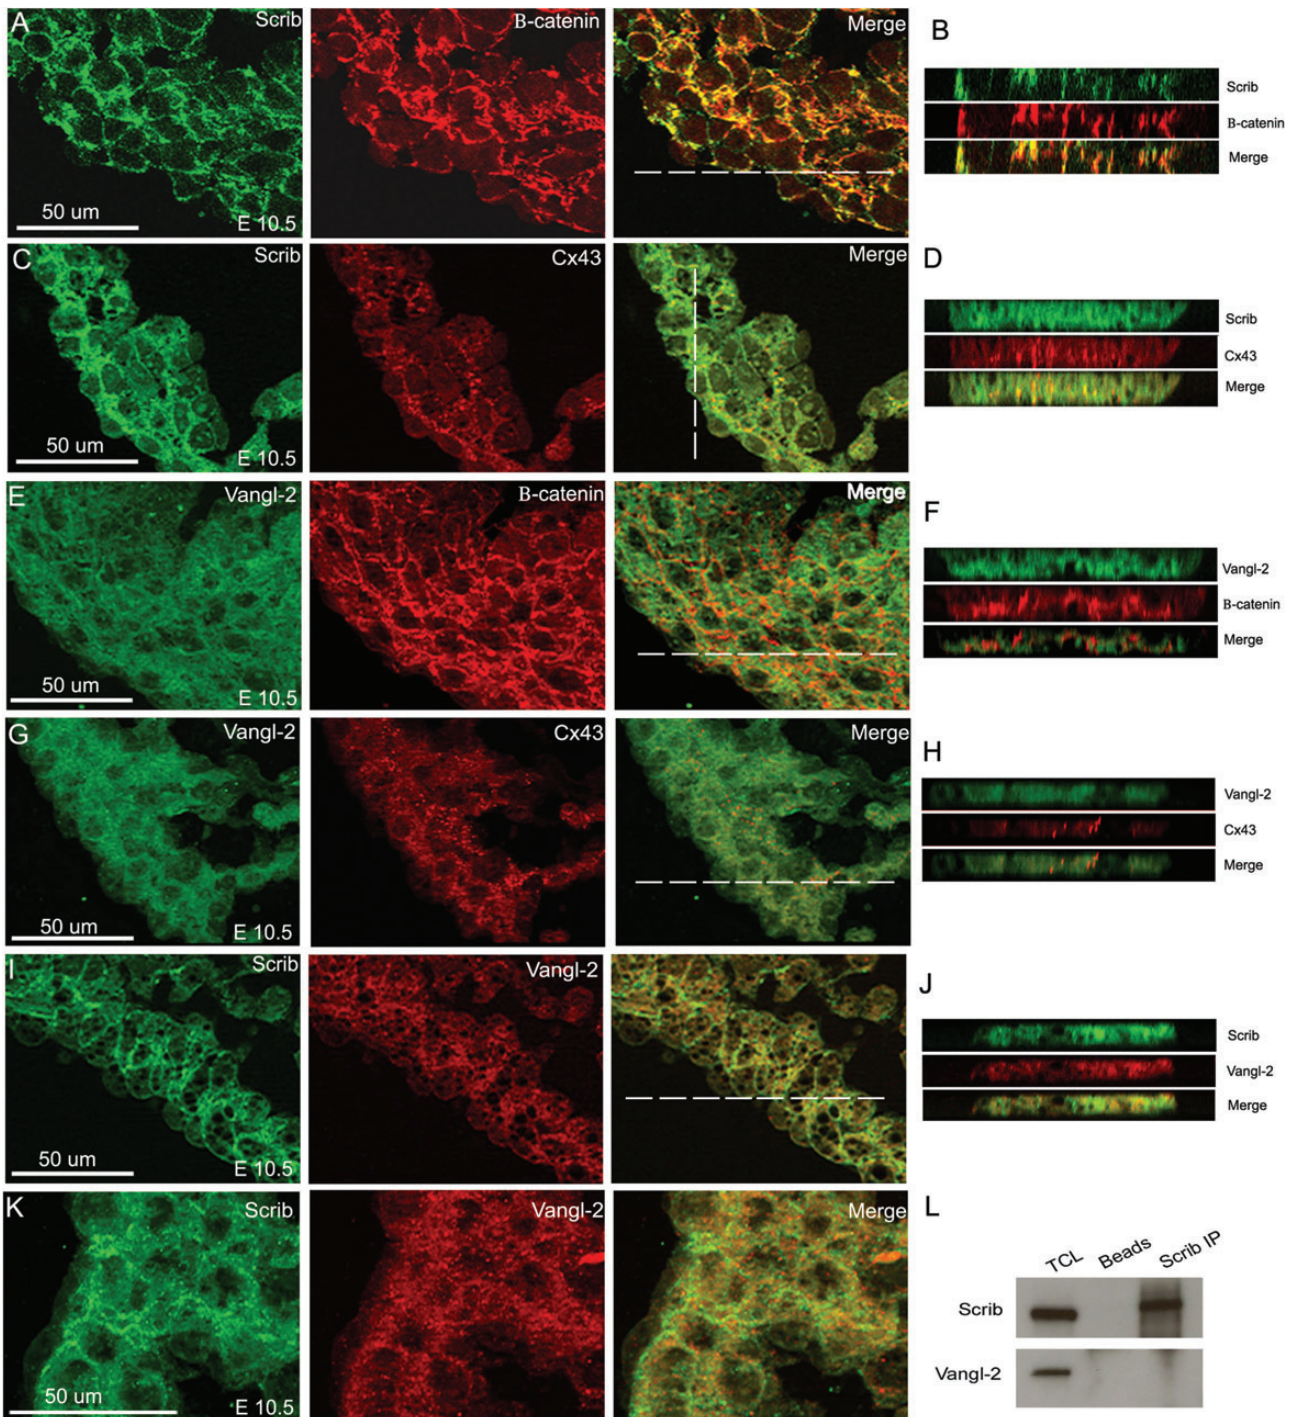

**Figure 5** Scrib co-localizes with adherens junctions and gap junctions in the developing myocardium. (A–D) Scrib localizes to cardiomyocyte cell membranes at E10.5, co-localizing with  $\beta$ -catenin (A and B) and connexin-43 (C and D). (E–H) In contrast, Vangl2 is found in the cytoplasm of the ventricular cardiomyocytes, with reduced staining in the cell membrane where there is no evidence of co-localization with  $\beta$ -catenin (E and F) or connexin-43 (G and H). (I–K) Although both Scrib and Vangl2 are found in cardiomyocytes, they do not appear to co-localize at E10.5. The position of the acquired z-axis images (B, D, F, H, and J) are indicated by the horizontal white line on the composite images. (L) Co-immunoprecipitation with Scrib antibody in H9C2 cell lysate confirmed no physical interaction with Vangl2.  $n = 3$  for all experiments. Scale bar = 50  $\mu$ m.

E10.5–E11.5, the *Rac1<sup>flf</sup>;Nkx2.5-Cre* embryos ( $n = 4$ ) were well formed and of normal size (data not shown). At E12.5, *Rac1<sup>flf</sup>;Nkx2.5-Cre* embryos showed marked cardiac oedema (5/5; Figure 7A,B) and were dead by E13.5 of gestation. Sectioning of the

E12.5 embryos revealed significant cardiac abnormalities, including small, underdeveloped ventricles with a thinned ventricular wall (Figure 7C,D). Thus, *Rac1* is essential for the normal development of the ventricular myocardium.



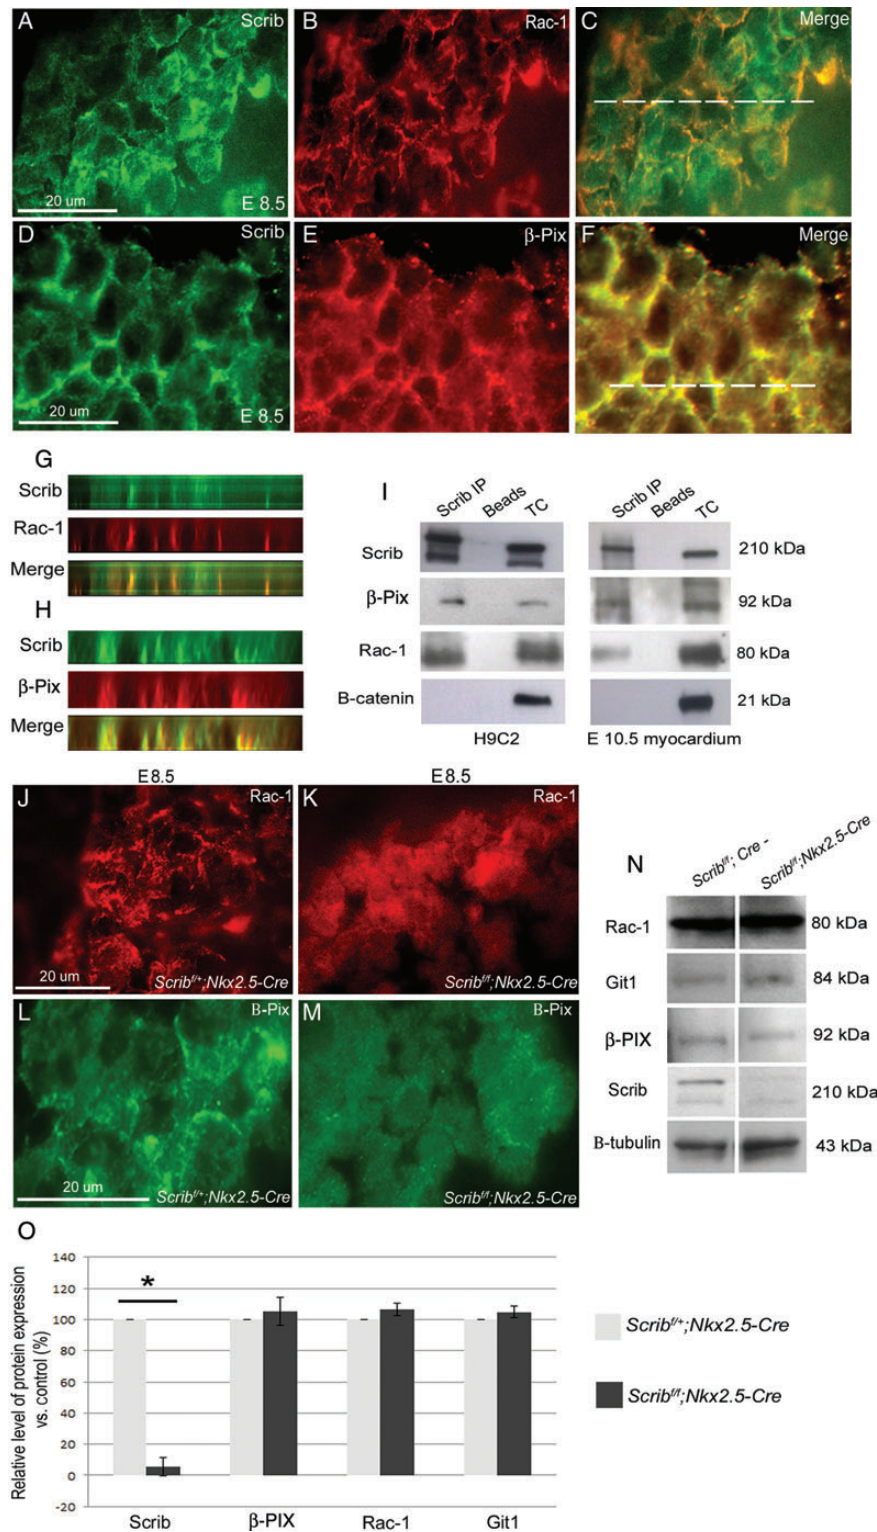

**Figure 6** Scrib, β-PIX, and Rac1 interact in the developing myocardium. (A–H) Immunostaining for Scrib (A and D), Rac1 (B), and β-PIX (E) in the E8.5 myocardium reveals overlapping localization at the cardiomyocyte membrane (C and F). The position of the acquired z-axis images (G and H) is indicated by the horizontal white line on the composite images (C and F). Co-localization (yellow) of Scrib/Rac1/β-PIX can be seen (G and H). (I) Co-immunoprecipitation was performed in lysates from H9C2 cells and in crude E10.5 heart homogenate ( $n = 3$ ). Scrib forms protein complexes with both β-PIX and Rac1. No precipitation of β-catenin with Scrib was observed. (J–M) Rac1 and β-PIX are lost from the cell membrane in the *Scrib*-depleted myocardium when compared with control sections. (N and O) Western blot analysis was performed for Scrib, Rac1, Git1, β-PIX, and β-tubulin (as a loading control), in homogenates from E10.5 control and *Scrib<sup>fl/fl</sup>;Nkx2.5-Cre* hearts ( $n = 3$  for each). The graphs display the percentage of protein expression in the mutant relative to the control. Only Scrib was significantly reduced in the *Scrib<sup>fl/fl</sup>;Nkx2.5-Cre* relative to the control,  $*P < 0.05$ . Error bars represent standard deviation. Scale bar = 20  $\mu\text{m}$  (A–F, J–M).

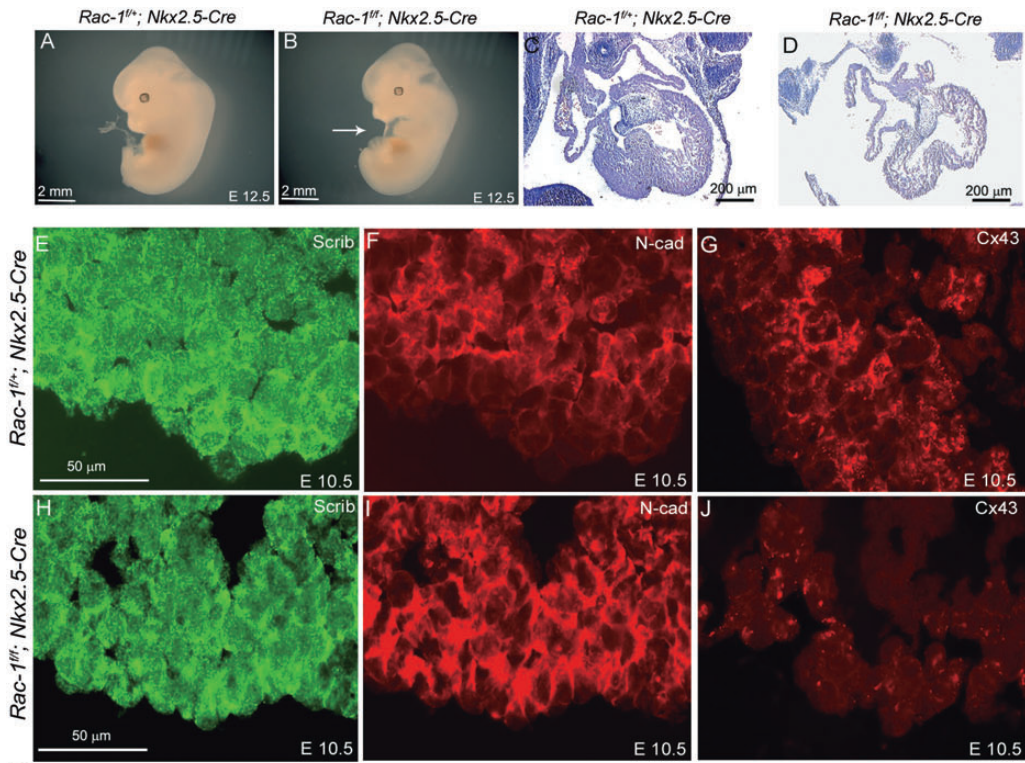

| GENOTYPE                                                  | EXTERNAL PHENOTYPE |          | n  | CARDIOVASCULAR DEFECT |           |        |                   |        | n  |
|-----------------------------------------------------------|--------------------|----------|----|-----------------------|-----------|--------|-------------------|--------|----|
|                                                           | Gastroschisis      | Normal   |    | Thin ventricular wall | VSD       | DORV   | Dextroposed aorta | Normal |    |
| <i>Scrib<sup>fl</sup>; Rac-1<sup>fl</sup>; Cre -</i>      | 0%                 | 100%     | 18 | 0%                    | 0%        | 0%     | 0%                | 100%   | 5  |
| <i>Scrib<sup>fl</sup>; Rac-1<sup>fl</sup>; Nkx2.5-Cre</i> | 5% (1)             | 94% (17) | 26 | 18% (2)               | 63.6% (7) | 9% (1) | 27.2% (3)         | 9% (1) | 11 |

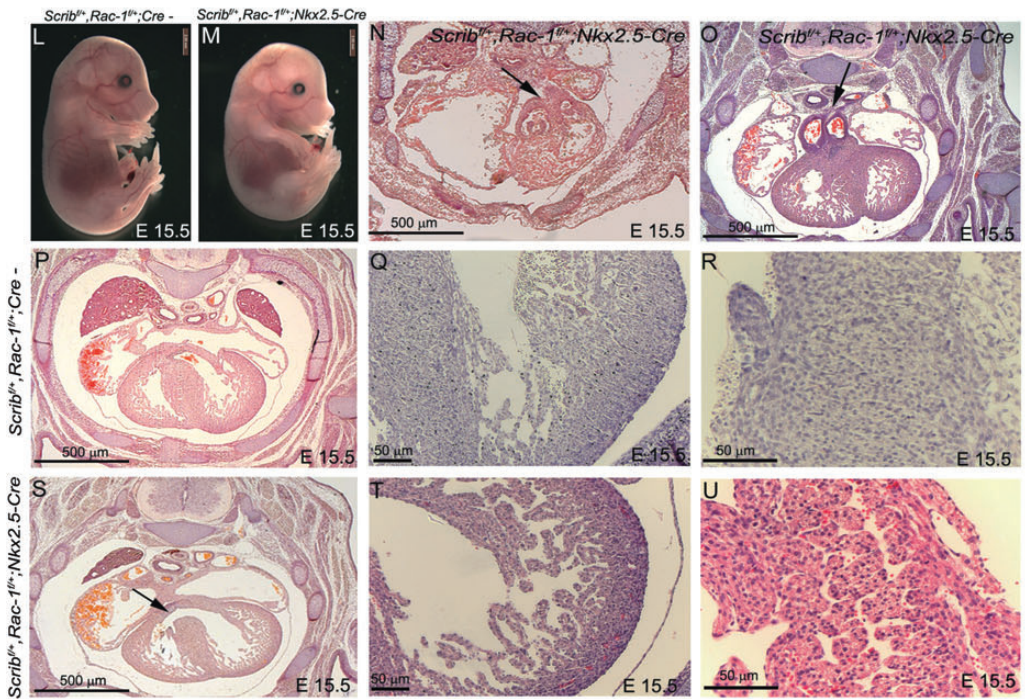

At E10.5, *Rac1<sup>ff</sup>;Nkx2.5-Cre* and control littermates were analysed for the expression of Scrib. Scrib staining was much more diffuse in these hearts, particularly in the ventricular wall where Rac1 and Scrib are found at a highest level (Figure 7E,H). Moreover, N-cadherin and  $\beta$ -catenin were lost from the cell membrane in *Rac1<sup>ff</sup>;Nkx2.5-Cre* ventricular cardiomyocytes, with increased cytoplasmic staining (Figure 7F,I and data not shown). More obviously still, expression of connexin-43 was almost completely lost from cardiomyocytes in *Rac1<sup>ff</sup>;Nkx2.5-Cre* embryos (Figure 7G,J). Taken together, these data support the idea that Scrib and Rac1 act together to regulate junctional complexes in cardiomyocytes.

### 3.8 Scrib and Rac1 genetically interact in the development of the ventricular myocardium

Finally, we wanted to test directly the idea that Scrib and Rac1 act together in the ventricular myocardium. To do this, *Rac1<sup>f</sup>, Scrib<sup>f</sup>*, and *Nkx2.5-Cre* mice were intercrossed. Of 18 *Scrib<sup>ff/+</sup>;Rac1<sup>ff/+</sup>;Nkx2.5-Cre* embryos examined at E15.5, one was dead at the time of collection and one had gastroschisis (Figure 7K). The remaining 16 embryos were externally normal (Figure 7L,M). Serial sectioning revealed cardiac malformations in 11/11 of the *Scrib<sup>ff/+</sup>;Rac1<sup>ff/+</sup>;Nkx2.5-Cre* embryos examined at E15.5. The most common malformation observed was ventricular septal defect, with thinned ventricular wall, dextraoposed aorta, and double outlet right ventricle also observed (Figure 7K,N–U). No cardiac malformations were observed in any of the control littermates (0/5 sectioned; Figure 7K). These data support the idea that the Scrib–Rac1 interaction is playing an essential role in the development of the ventricular myocardium.

## 4. Discussion

We show here that a protein complex that forms at the cell membrane, composed of Scrib,  $\beta$ -PIX, and Rac1, plays an essential role in the early ventricular myocardium. Disruption of this complex leads to loss of key proteins from the cardiomyocyte cell membrane, disturbed cellular architecture, and results in structural abnormalities of the ventricular myocardium including ventricular septal defects. Deletion of *Scrib* in either cardiomyocyte progenitors (with *Nkx2.5-Cre*) or differentiating ventricular myocardium (with *Mlc2v-Cre*) results in ventricular septal defects. There are several possible explanations for why these defects might arise, including abnormalities in cell proliferation or death, cell migration into the heart, and interactions between cardiomyocytes and maturation of the ventricle. Cell proliferation and cell death analyses, carried out before the appearance of the ventricular anomalies, showed there were no differences in these parameters between control and

mutants at stages immediately before abnormalities become apparent. It seems highly unlikely that abnormalities in cell migration into or within the heart cause the defects, as *Scrib<sup>ff</sup>;Wnt1-Cre* and *Scrib<sup>ff</sup>;Isl1-Cre*, in which *Scrib* is deleted in migratory NCC and second heart field cells, respectively, are phenotypically normal. Moreover, the migration of epicardially derived cells into the myocardium, which is known to be crucial for ventricular development, occurs after the appearance of the defects in the *Scrib<sup>ff</sup>;Nkx2.5-Cre* mutants. We have previously shown that the distribution of junctional proteins, including N-cadherin and ZO-1, is abnormal in cardiomyocytes from the *Scrib* mutant, *Crc*, and that the cardiomyocytes appear disorganized in the early heart.<sup>9</sup> To complement this, we show here that there is an abnormality in the cellular architecture of the trabeculae. Moreover, the mutant myocardium appears immature and markers of differentiated cardiomyocytes show delayed expression. Scrib is known to be associated with junctional complexes between cells and thus, abnormalities in the relationships between adjacent cardiomyocytes could lead to delayed and abnormal formation of trabeculae, which could in itself impact on the development of the ventricular septum. These defects in myocardial architecture, although subtle, persist through foetal life, with abnormal patterning of the trabeculae and growth of the ventricular septum. Analysis of these mice at 6 months of age showed that their heart was well formed with no obvious signs of hypertrophy, although there was marked fibrosis of the ventricular myocardium. Thus, the mice largely recover from, or at least tolerate, the early anomalies in the ventricular myocardium. This is analogous to the situation in humans, where muscular ventricular septal defects frequently close spontaneously during infancy.<sup>22</sup> Moreover, fibrosis is a common finding in adults with unrepaired ventricular septal defects.<sup>23</sup> Fibrosis is initially a reparative process acting to maintain the functional integrity of the myocardium, but can have adverse consequences for ventricular mobility if it becomes widespread. Thus, it is possible that the *Scrib<sup>ff</sup>;Nkx2.5-Cre* mice might progress to heart failure in the longer term, although this analysis was outside the scope of this study.

Mice lacking functional Scrib, in the *Crc* mutant, have a range of classical PCP defects that include shortened body axis and neural tube defects.<sup>6,24</sup> A similar pattern of anomalies are observed in other PCP mutants, including the *Vangl2* mutant *loop-tail (Lp)*, and the genetic link between these abnormalities and the PCP pathway has been confirmed.<sup>6,9</sup> Although our previous studies suggested that *Crc* and *Lp* mutants interact genetically to regulate cardiac development,<sup>9</sup> and *Lp* mutants have significant myocardial disorganization<sup>25</sup> similar to that seen when Scrib is lost from the myocardium, the current study suggests that this is unlikely to be a consequence of a physical interaction between the two proteins. Whilst Scrib and *Vangl2* are known to interact in some tissues,<sup>8</sup> we cannot show this in cardiomyocytes. Thus, Scrib appears to

**Figure 7** Rac1 is required for normal development of the myocardium. (A and B) *Rac1<sup>ff</sup>;Nkx2.5-Cre* embryos develop cardiac oedema by E12.5 (white arrow in B). (C–D) Sectioning of *Rac1<sup>ff</sup>;Nkx2.5-Cre* at E12.5 reveals an immature heart with thin ventricular walls and a poorly developed interventricular septum. (E–J) Fluorescent immunostaining for Scrib, N-cadherin, and connexin-43 at E10.5 reveals mislocalization of Scrib and N-cadherin in the *Rac1<sup>ff</sup>;Nkx2.5-Cre*, particularly in the outer region of the ventricular wall, and loss of connexin-43. (K) Table showing numbers of *Scrib<sup>ff/+</sup>;Rac1<sup>ff/+</sup>;Nkx2.5-Cre* embryos with an external or cardiac phenotype, compared with littermate controls. (L and M) The majority (16/18) of *Scrib<sup>ff/+</sup>;Rac1<sup>ff/+</sup>;Nkx2.5-Cre* had no external phenotype at E15.5. (N–U) Transverse sectioning of control and *Scrib<sup>ff/+</sup>;Rac1<sup>ff/+</sup>;Nkx2.5-Cre* embryos reveals double outlet right ventricle (N,O; black arrows) and ventricular septal defects in the latter (S; black arrow). The ventricular myocardium is immature in the double heterozygotes (T), compared with control littermates (Q), and the interventricular septum is poorly compacted with channels running through it (compare U with R). Scale bar: A,B,L,M = 2 mm; C,D = 200  $\mu$ m, E–J,O,R,T,U = 50  $\mu$ m; P,S,N,O = 500  $\mu$ m.

act outside the Vangl2-associated PCP pathway in the early ventricular myocardium.

Although we were able to confirm crucial roles for Scrib in the development of the myocardium, we show here that cardiac malalignment defects are likely secondary to the neural tube defects and gastroschisis observed when Scrib is lost throughout the whole embryo. Cardiac malalignment was only observed in the presence of these severe embryonic patterning defects. Gastroschisis grossly distorts the abdominal wall and thus may well directly affect positioning of the heart in the chest, mechanically disrupting normal heart remodelling. Thus, caution must be observed when interpreting cardiac phenotypes and determining causality in the presence of other embryonic patterning abnormalities. Indeed, the high incidence of cardiovascular defects found in babies with either neural tube or body wall defects, reported to be as high as 40%,<sup>26,27</sup> may reflect the possibility that the heart malformations are a secondary consequence of the other structural anomalies.

Although our data rule out direct interactions with Vangl2 in developing cardiomyocytes, Scrib has been shown to interact with a number of other proteins. For example, Scrib interacts with  $\beta$ -PIX in a number of cell types. Scrib localization to the cell membrane has been shown to be required for Rac1/ $\beta$ -PIX exocytosis in neuroendocrine cells,<sup>20</sup> whereas Scrib function has been shown to be required for recruitment of Rac1 to the lamellipodium in a mammary cell line<sup>28</sup> and in migrating fibroblasts.<sup>29</sup> Our study shows that Scrib,  $\beta$ -PIX, and Rac1 are found in a complex in native protein extracts from cardiomyocyte cell lines and hearts from early mouse embryos. Moreover, loss of either Scrib or Rac1 results in a reduction in the membrane association of the other component, although not a reduction in the overall levels of the protein. The overall phenotype of *Scrib<sup>fl/fl</sup>;Nkx2.5Cre* and *Rac1<sup>fl/fl</sup>;Nkx2.5Cre* embryos is similar at E12.5, although the latter is more severe and the mice die by E13.5, before ventricular septation and alignment with the outflow vessels is complete. *Scrib<sup>fl/+</sup>;Rac1<sup>fl/+</sup>;Nkx2.5-Cre* (double heterozygote) embryos also have a similar phenotype, with abnormalities in the formation of the ventricular myocardium, although in this case there are additional abnormalities in the ventriculo-arterial connections that are not apparent in *Scrib* mutants. It is possible though that they might have been observed in *Rac1<sup>fl/fl</sup>;Nkx2.5Cre* embryos, if these had survived long enough for the abnormalities to become apparent. Although Rac1 has not been previously implicated in myocardial development, as *Rac1* null mice die early in development before the heart is well formed,<sup>30</sup> it has been implicated in adult cardiovascular pathologies. For example, loss of Rac1 from cardiomyocytes is protective against angiotensin II-induced hypertrophy.<sup>31</sup> In contrast, expression of a constitutively active form of Rac1 in the mature myocardium leads to severe dilated cardiomyopathy and early death,<sup>32</sup> a result that correlates with the finding of elevated levels of RAC1 in human patients with cardiac hypertrophy and a range of other cardiovascular pathologies.<sup>33</sup> Our data suggest that Rac1 also plays a crucial role in the developing myocardium. The observations that Rac1 is required for cardiomyocyte alignment in response to mechanical stress, at least *in vitro*,<sup>34</sup> and that N-cadherin signals via Rac1 to localize connexin-43 in cardiomyocytes,<sup>35</sup> support the idea that Scrib–Rac1 signalling may be required for the organization and maturation of the developing cardiomyocytes. The loss of  $\beta$ -catenin, N-cadherin, and connexin-43 from the membrane of *Rac1<sup>fl/fl</sup>;Nkx2.5-Cre* myocardial cells implies a role in cardiomyocyte–cardiomyocyte contacts and suggests that this pathway may be crucial not only during development, but also in cardiac disease.

## Supplementary material

Supplementary material is available at *Cardiovascular Research* online.

**Conflict of interest:** none declared.

## Funding

This work was supported by the British Heart Foundation (PG/07/086 and PG/11/76/29108). Funding to pay the Open Access publication charges for this article was provided by the British Heart Foundation.

## References

- Anderson RH, Ho SY, Redmann K, Sanchez-Quintana D, Lunkenheimer PP. The anatomical arrangement of the myocardial cells making up the ventricular mass. *Eur J Cardiothorac Surg* 2005;**28**:517–525.
- Olivetto I, Cecchi F, Poggesi C, Yacoub MH. Developmental origins of hypertrophic cardiomyopathy phenotypes: a unifying hypothesis. *Nat Rev Cardiol* 2009;**6**:317–321.
- Assémat E, Bazellières E, Pallesi-Pocachard E, Le Bivic A, Massey-Harroche D. Polarity complex proteins. *Biochim Biophys Acta* 2008;**1778**:614–630.
- Elsum I, Yates L, Humbert PO, Richardson HE. The Scribble-Dlg-Lgl polarity module in development and cancer: from flies to man. *Essays Biochem* 2012;**53**:141.
- Pearson HB, Perez-Mancera PA, Dow LE, Ryan A, Tennstedt P, Bogani D, Elsum I, Greenfield A, Tuveson DA, Simon R, Humbert PO. SCRIB expression is deregulated in human prostate cancer, and its deficiency in mice promotes prostate neoplasia. *J Clin Invest* 2011;**121**:4257–4267.
- Murdoch JN, Rachel RA, Shah S, Beermann F, Stanier P, Mason CA, Copp AJ. Circletail, a new mouse mutant with severe neural tube defects: chromosomal localization and interaction with the loop-tail mutation. *Genomics* 2001;**78**:55–63.
- Yates LL, Papakrivopoulou J, Long DA, Goggolidou P, Connolly JO, Woolf AS, Dean CH. The planar cell polarity gene Vangl2 is required for mammalian kidney-branching morphogenesis and glomerular maturation. *Hum Mol Genet* 2010;**19**:4663–4676.
- Kallay LM, McNickle A, Brennwald PJ, Hubbard AL, Braiterman LT. Scribble associates with two polarity proteins, Lgl2 and Vangl2, via distinct molecular domains. *J Cell Biochem* 2006;**99**:647–664.
- Phillips HM, Rhee HJ, Murdoch JN, Hildreth V, Peat JD, Anderson RH, Copp AJ, Chaudhry B, Henderson DJ. Disruption of planar cell polarity signaling results in congenital heart defects and cardiomyopathy attributable to early cardiomyocyte disorganization. *Circ Res* 2007;**101**:137–145.
- Walmsley MJ, Ooi SK, Reynolds LF, Smith SH, Ruf S, Mathiot A, Vanes L, Williams DA, Cancro MP, Tybulewicz VL. Critical roles for Rac1 and Rac2 GTPases in B cell development and signaling. *Science* 2003;**302**:459–462.
- Moses KA, DeMayo F, Braun RM, Reecy JL, Schwartz RJ. Embryonic expression of an Nkx2-5/Cre gene using ROSA26 reporter mice. *Genesis* 2001;**31**:176–180.
- Lallemand Y, Luria V, Haffner-Krausz R, Lonai P. Maternally expressed PGK-Cre transgene as a tool for early and uniform activation of the Cre site-specific recombinase. *Transgenic Res* 1998;**7**:105–112.
- Yang L, Cai CL, Lin L, Qyang Y, Chung C, Monteiro RM, Mummery CL, Fishman GI, Cogen A, Evans S. Isl1Cre reveals a common Bmp pathway in heart and limb development. *Development* 2006;**133**:1575–1585.
- Chen J, Kubalak SW, Chien KR. Ventricular muscle-restricted targeting of the RXRalpha gene reveals a non-cell-autonomous requirement in cardiac chamber morphogenesis. *Development* 1998;**125**:1943–1949.
- Danielian PS, Muccino D, Rowitch DH, Michael SK, McMahon AP. Modification of gene activity in mouse embryos in utero by a tamoxifen-inducible form of Cre recombinase. *Curr Biol* 1998;**8**:1323–1326.
- Merki E, Zamora M, Raya A, Kawakami Y, Wang J, Zhang X, Burch J, Kubalak SW, Kaliman P, Izpisua Belmonte JC, Chien KR, Ruiz-Lozano P. Epicardial retinoid X receptor alpha is required for myocardial growth and coronary artery formation. *Proc Natl Acad Sci USA* 2005;**102**:18455–18460.
- Newman RA, Hacker MP, Krakoff IH. Amelioration of adriamycin and daunorubicin myocardial toxicity by adenosine. *Cancer Res* 1981;**41**(9 Pt 1):3483–3488.
- Boczonadi V, Määttä A. Annexin A9 is a periplakin interacting partner in membrane-targeted cytoskeletal linker protein complexes. *FEBS Lett* 2012;**586**:3090–3096.
- Audebert S, Navarro C, Nourry C, Chasserot-Golaz S, Lécine P, Bellaiche Y, Dupont JL, Premont RT, Sempéré C, Strub JM, Van Dorsselaer A, Vitale N, Borg JP. Mammalian Scribble forms a tight complex with the betaPIX exchange factor. *Curr Biol* 2004;**14**:987–995.
- Momboisse F, Lonchamp E, Calco V, Ceridono M, Vitale N, Bader MF, Gasman S. betaPIX-activated Rac1 stimulates the activation of phospholipase D, which is associated with exocytosis in neuroendocrine cells. *J Cell Sci* 2000;**112**(Pt 6):798–806.
- Fukata M, Nakagawa M, Kaibuchi K. Roles of Rho-family GTPases in cell polarisation and directional migration. *Curr Opin Cell Biol* 2003;**15**:590–597.
- Gómez O, Martínez J, Olivella A, Bennisar M, Crispí F, Masoller N, Bartrons J, Puerto B, Gratacós E. Isolated ventricular septal defects in the era of advanced fetal

- echocardiography: risk of chromosomal anomalies and spontaneous closure rate from diagnosis to the first year of life. *Ultrasound Obstet Gynecol* 2014;**43**:65–71.
23. Hopkins WE, Waggoner AD, Gussak H. Quantitative ultrasonic tissue characterization of myocardium in cyanotic adults with an unrepaired congenital heart defect. *Am J Cardiol* 1994;**74**:930–934.
  24. Montcouquiol M, Rachel RA, Lanford PJ, Copeland NG, Jenkins NA, Kelley MW. Identification of Vangl2 and Scrb1 as planar polarity genes in mammals. *Nature* 2003;**423**:173–177.
  25. Phillips HM, Hildreth V, Peat JD, Murdoch JN, Kobayashi K, Chaudhry B, Henderson DJ. Non-cell-autonomous roles for the planar cell polarity gene Vangl2 in development of the coronary circulation. *Circ Res* 2008;**102**:615–623.
  26. Koçak G, Onal C, Koçak A, Karakurt C, Ates O, Cayli SR, Yologlu S. Prevalence and outcome of congenital heart disease in patients with neural tube defect. *J Child Neurol* 2008;**23**:526–530.
  27. Kunz LH, Gilbert WM, Towner DR. Increased incidence of cardiac anomalies in pregnancies complicated by gastroschisis. *Am J Obstet Gynecol* 2005;**193**(3 Pt 2):1248–1252.
  28. Dow LE, Kauffman JS, Caddy J, Zarbalis K, Peterson AS, Jane SM, Russell SM, Humbert PO. The tumour-suppressor Scribble dictates cell polarity during directed epithelial migration: regulation of Rho GTPase recruitment to the leading edge. *Oncogene* 2007;**26**:2272–2282.
  29. Nola S, Sebbagh M, Marchetto S, Osmani N, Nourry C, Audebert S, Navarro C, Rachel R, Montcouquiol M, Sans N, Etienne-Manneville S, Borg JP, Santoni MJ. Scrib regulates PAK activity during the cell migration process. *Hum Mol Genet* 2008;**17**:3552–3565.
  30. Sugihara K, Nakatsuji N, Nakamura K, Nakao K, Hashimoto R, Otani H, Sakagami H, Kondo H, Nozawa S, Aiba A, Katsuki M. Rac1 is required for the formation of three germ layers during gastrulation. *Oncogene* 1998;**17**:3427–3433.
  31. Satoh M, Ogita H, Takeshita K, Mukai Y, Kwiatkowski DJ, Liao JK. Requirement of Rac1 in the development of cardiac hypertrophy. *Proc Natl Acad Sci USA* 2006;**103**:7432–7437.
  32. Sussman MA, Welch S, Walker A, Klevitsky R, Hewett TE, Price RL, Schaefer E, Yager K. Altered focal adhesion regulation correlates with cardiomyopathy in mice expressing constitutively active rac1. *J Clin Invest* 2000;**105**:875–886.
  33. Sawada N, Li Y, Liao JK. Novel aspects of the roles of Rac1 GTPase in the cardiovascular system. *Curr Opin Pharmacol* 2010;**10**:116–121.
  34. Yamane M, Matsuda T, Ito T, Fujio Y, Takahashi K, Azuma J. Rac1 activity is required for cardiac myocyte alignment in response to mechanical stress. *Biochem Biophys Res Commun* 2007;**353**:1023–1027.
  35. Matsuda T, Fujio Y, Nariai T, Ito T, Yamane M, Takatani T, Takahashi K, Azuma J. N-cadherin signals through Rac1 determine the localization of connexin 43 in cardiac myocytes. *J Mol Cell Cardiol* 2006;**40**:495–502.
